# Supplementary figures and images for: IPECnet: ML model for predicting the area of water solubility of interpolyelectrolyte complexes
Source: Royal Society of Chemistry journal article supplement (doi:10.1039/d4cp04775c), 2025-01-01

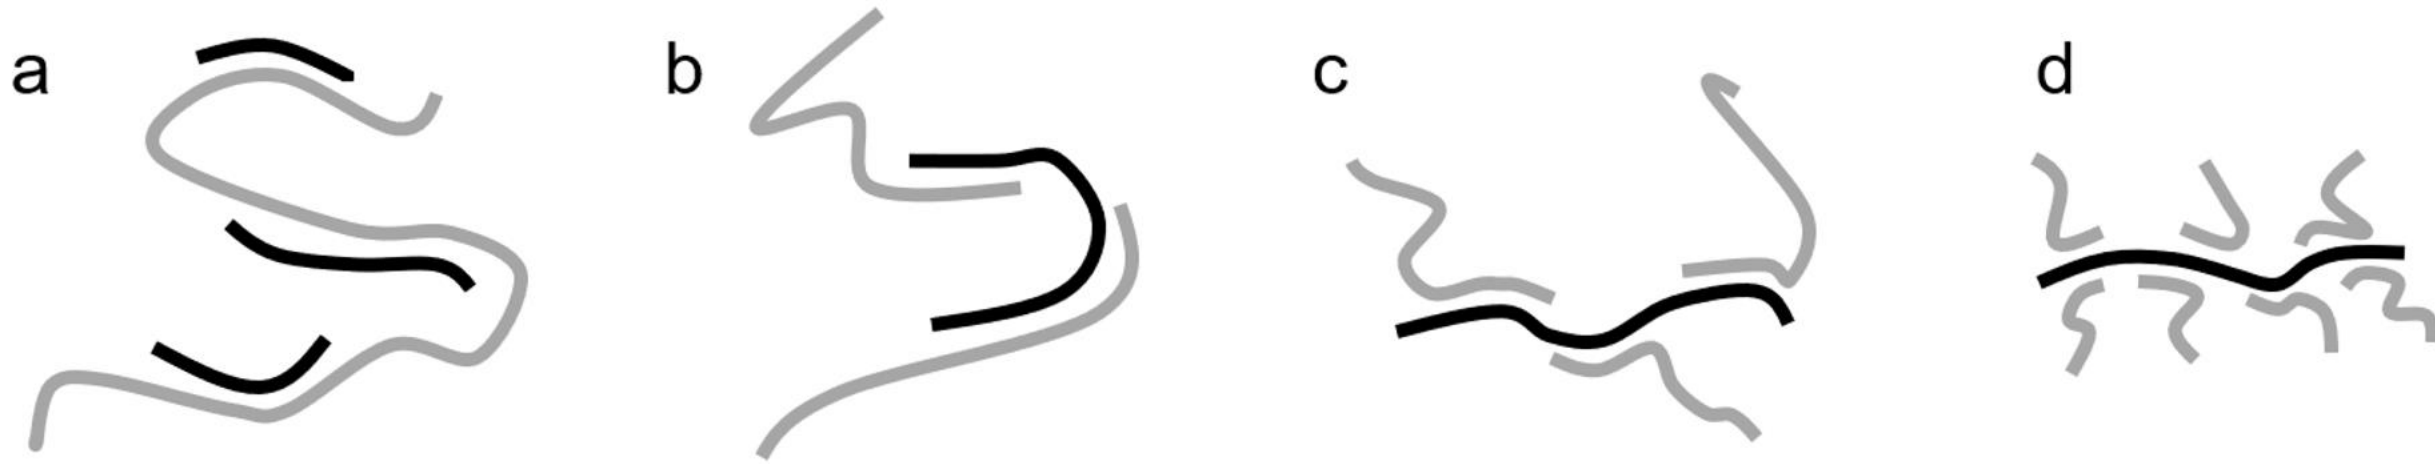

Supplement: d4cp04775c3.pdf [file d4cp04775c3.pdf]

solution

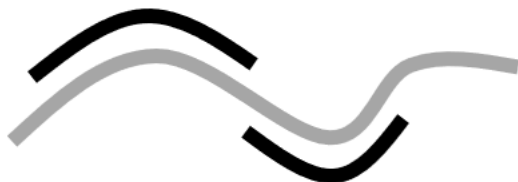

+

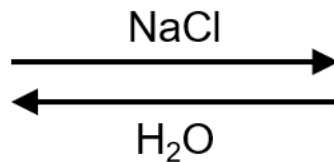

solution

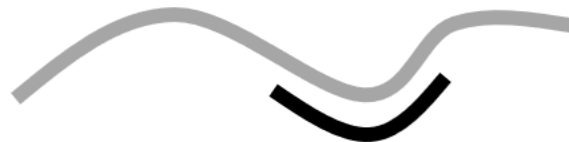

+

solution

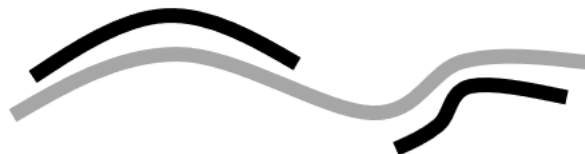

sediment

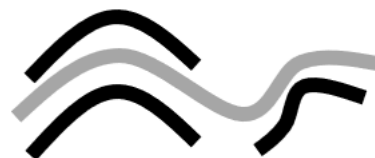

Supplement: d4cp04775c4.pdf [file d4cp04775c4.pdf]
